# Supplementary material for: Development of a sample preparation procedure for Sr isotope analysis of Portland cements
Source: Springer Nature journal article supplement (doi:10.1007/s00216-021-03821-7), 2022-01-14
Supplement: MOESM1 [file 216_2021_3821_MOESM1_ESM.pdf]

**SUPPLEMENTARY INFORMATION FOR:**

***Development of a sample preparation procedure for Sr isotope analysis of  
Portland cements***

Anera Kazlagić<sup>1</sup>, Francesco F. Russo<sup>1</sup>, Jochen Vogl<sup>1</sup>, Patrick Sturm<sup>2</sup>, Dietmar Stephan<sup>3</sup>,  
Gregor J. G. Gluth<sup>2</sup>

<sup>1</sup> Federal Institute for Materials Research and Testing, Division 1.1 Inorganic Trace Analysis,  
Richard-Willstätter-Straße 11, 12489 Berlin, Germany

<sup>2</sup> Federal Institute for Materials Research and Testing, Division 7.4 Technology of Construction  
Materials, Unter den Eichen 87, 12205 Berlin, Germany

<sup>3</sup> Technische Universität Berlin, Department of Civil Engineering, Building Materials and  
Construction Chemistry, Gustav-Meyer-Allee 25, 13355 Berlin, Germany

Correspondence to: anera.kazlagic@bam.de

**Contents**

|                    |      |
|--------------------|------|
| Abbreviations..... | S-2  |
| Equation.....      | S-2  |
| Fig. S1.....       | S-3  |
| Fig. S2.....       | S-4  |
| Fig. S3.....       | S-5  |
| Fig. S4.....       | S-6  |
| Fig. S5.....       | S-7  |
| Table S1.....      | S-8  |
| Table S2.....      | S-9  |
| Table S3.....      | S-10 |
| Table S4.....      | S-11 |
| Table S5.....      | S-12 |
| Table S6.....      | S-13 |
| Table S7.....      | S-14 |

Abbreviations:

Sieving – sieving on 11- $\mu$ m sieve

KOSH - potassium hydroxide/sucrose solution

Conc. acid - Concentrated hydrochloric acid/nitric acid dissolution

Dil. acid - Dilute nitric acid dissolution

Equation:

$$\Delta_{abs} = \left| \left( \frac{{}^{87}\text{Sr}}{{}^{86}\text{Sr}} \right)_{\text{cement}} - \left( \frac{{}^{87}\text{Sr}}{{}^{86}\text{Sr}} \right)_{\text{clinker}} \right| \quad (1)$$

Legend:

$\Delta_{abs}$  - Absolute difference of processed cement from the clinker

$({}^{87}\text{Sr}/{}^{86}\text{Sr})_{\text{cement}}$  – Sr isotope ratio of processed cement

$({}^{87}\text{Sr}/{}^{86}\text{Sr})_{\text{clinker}}$  – Sr isotope ratio of the clinker

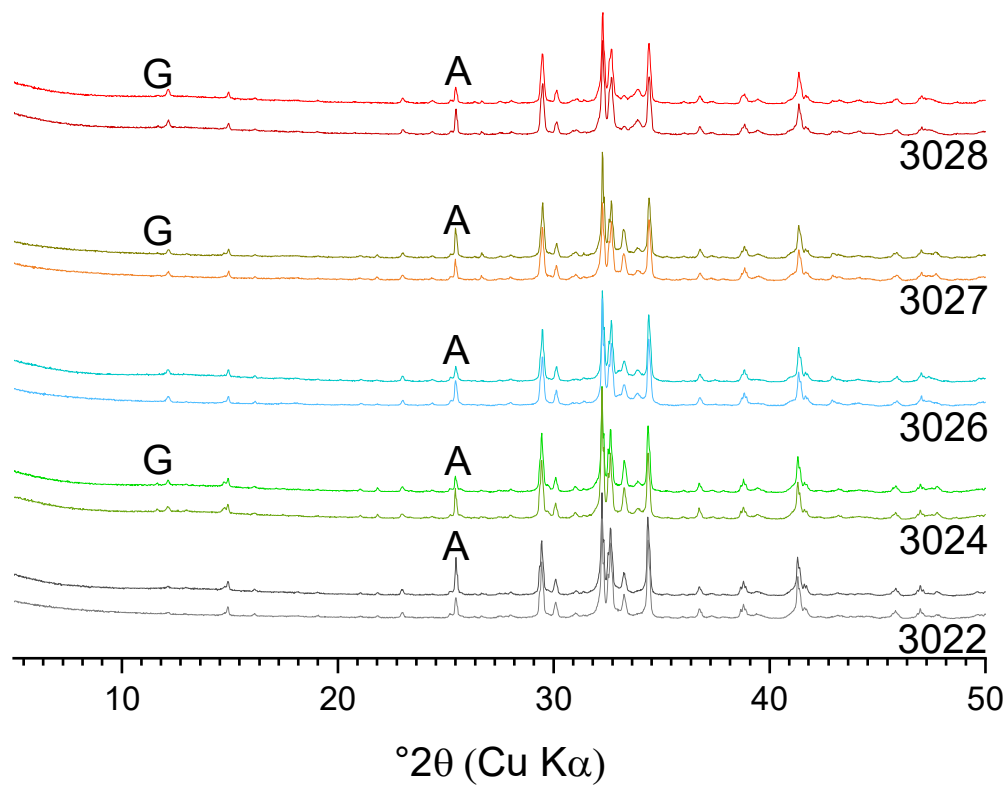

**Fig. S1.** X-ray diffractogram of non-treated cement (directly on top of the sample code) and sieved cement (on top of the respective non-treated pattern) for samples 3022, 3024, 3026, 3027 and 3028. G = Gypsum, A = Anhydrite.

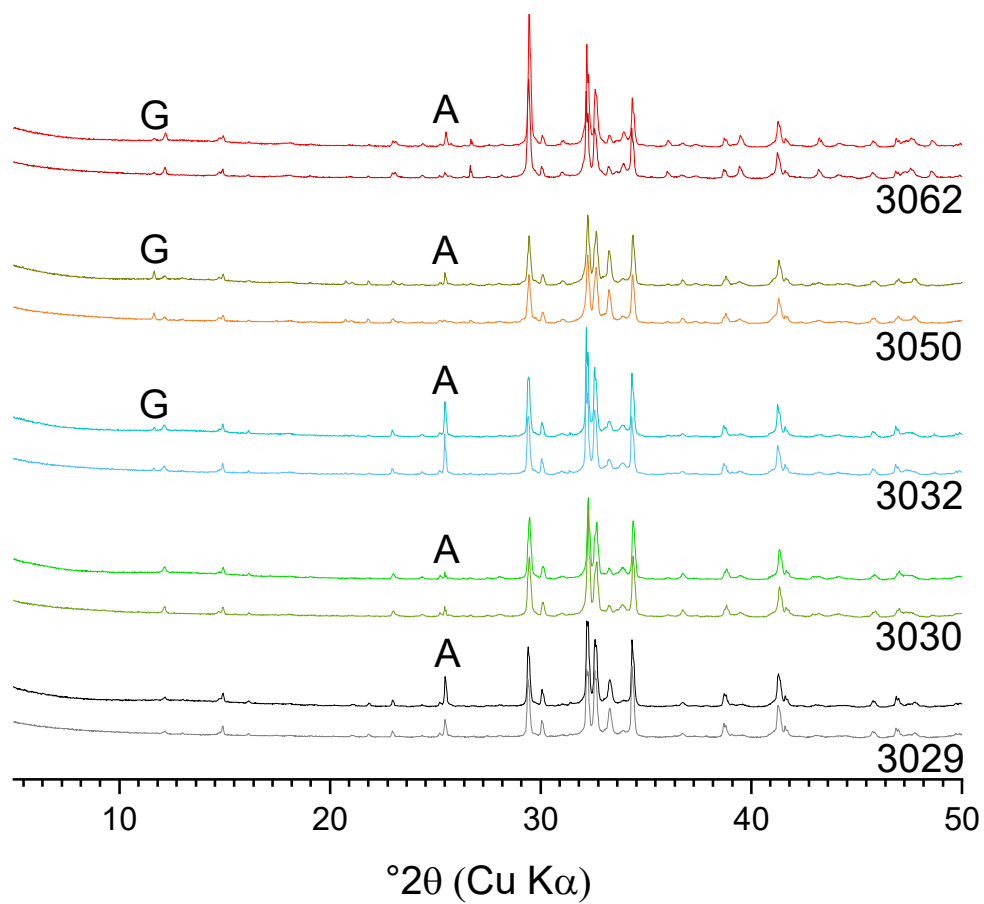

**Fig. S2.** X-ray diffractogram of non-treated cement (directly on top of the sample code) and sieved cement (on top of the respective non-treated pattern) for samples 3029, 3030, 3032, 3050 and 3062. G = Gypsum, A = Anhydrite.

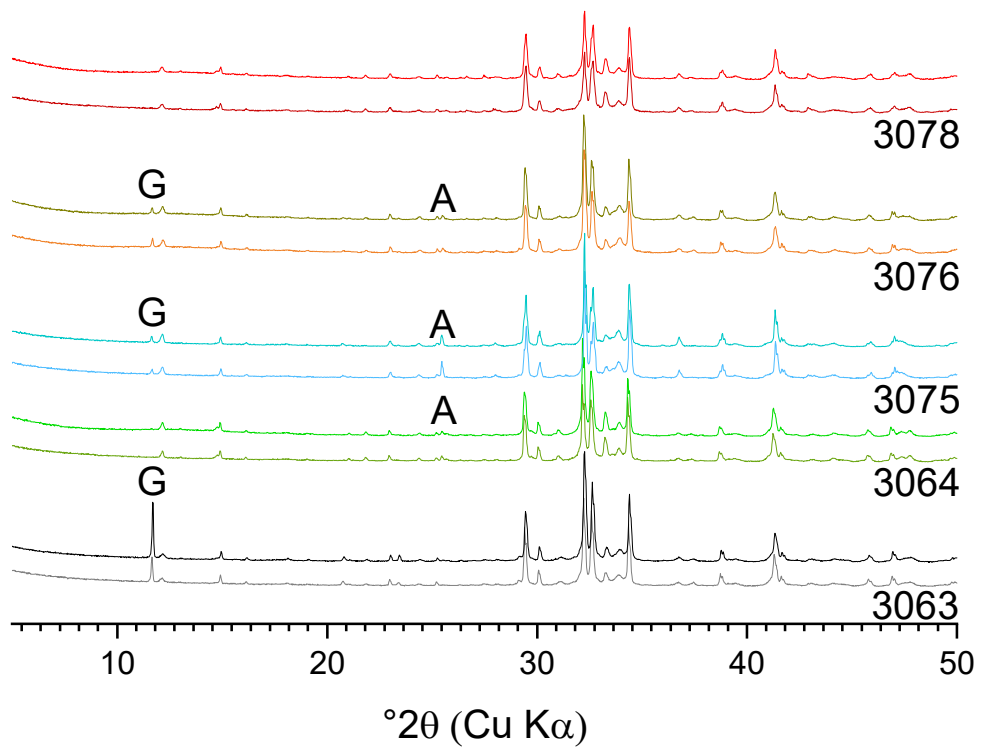

**Fig. S3.** X- ray diffractogram of non-treated cement (directly on top of the sample code) and sieved cement (on top of the respective non-treated pattern) for samples 3063, 3064, 3075, and 3078. G = Gypsum, A = Anhydrite.

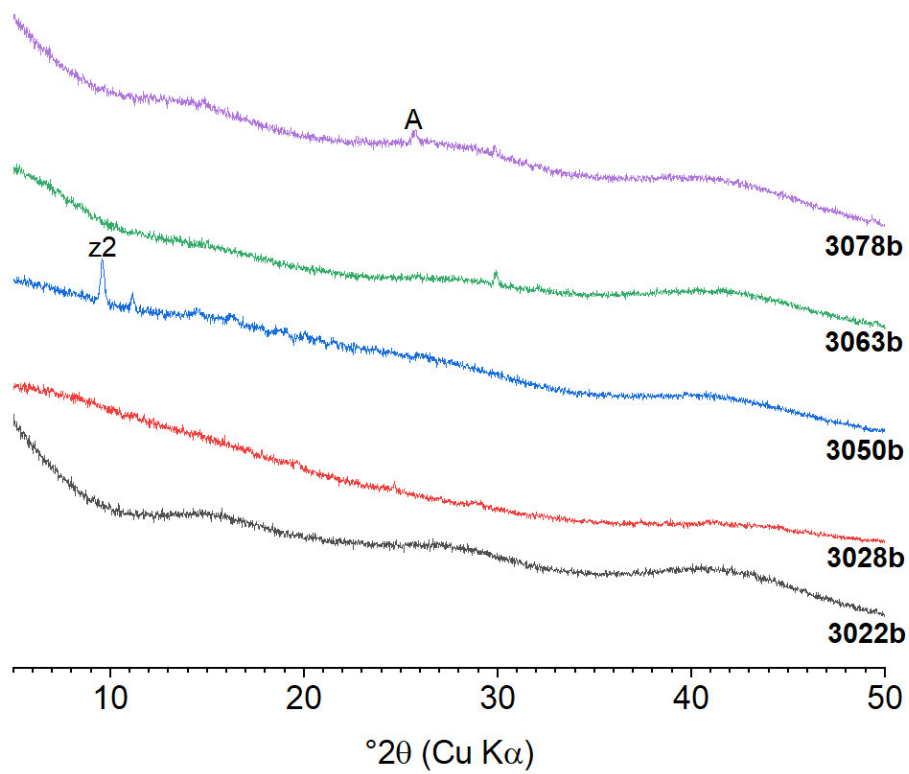

**Fig. S4.** X-ray diffractograms of the clinker samples 3022b, 3028b, 3050b, 3063b and 3078b after conc. acid treatment; A = anhydrite, z2 = zeolite-type phase.

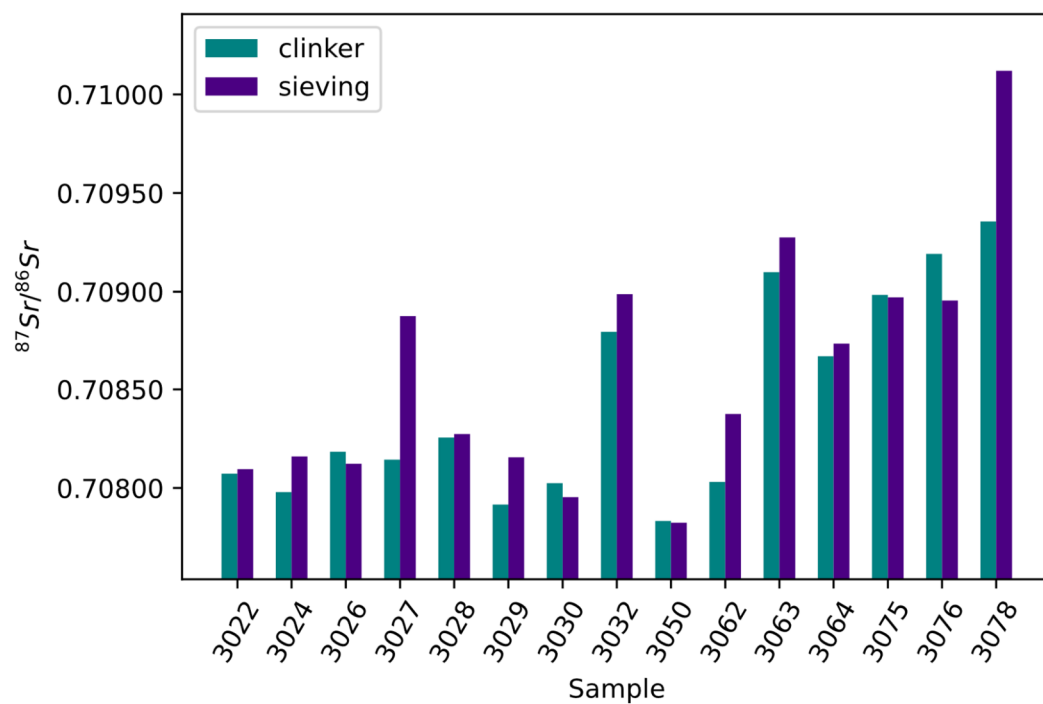

**Fig. S5.** Comparison of  $^{87}\text{Sr}/^{86}\text{Sr}$  isotope ratios from fifteen cement samples prepared with sieving and subsequent conc. acid treatment (purple) and fifteen corresponding clinker samples after conc. acid treatment (blue-green).

**Table S1.**  $^{87}\text{Sr}/^{86}\text{Sr}$  isotope ratio of processed clinkers, and cements after the KOSH and sieving treatment and clinker.<sup>1</sup> 2SE represents 2 x Standard Error (Standard Deviation divided by the square root of number of measured isotope ratios).

| Sample | $^{87}\text{Sr}/^{86}\text{Sr}$<br>(clinker) | 2SE x 10 <sup>-5</sup><br>(clinker) | $^{87}\text{Sr}/^{86}\text{Sr}$<br>(KOSH) | 2SE x 10 <sup>-5</sup><br>(KOSH) | $^{87}\text{Sr}/^{86}\text{Sr}$<br>(Sieving) | 2SE x 10 <sup>-5</sup><br>(Sieving) |
|--------|----------------------------------------------|-------------------------------------|-------------------------------------------|----------------------------------|----------------------------------------------|-------------------------------------|
| 3022   | 0.70807                                      | 1                                   | 0.70810                                   | 1                                | 0.70807                                      | 1                                   |
| 3024   | 0.70798                                      | 1                                   | 0.70816                                   | 1                                | 0.70811                                      | 1                                   |
| 3026   | 0.70818                                      | 3                                   | 0.70812                                   | 7                                | 0.70809                                      | 1                                   |
| 3027   | 0.70814                                      | 1                                   | 0.70888                                   | 6                                | 0.70886                                      | 1                                   |
| 3028   | 0.70826                                      | 1                                   | 0.70827                                   | 1                                | 0.70825                                      | 2                                   |
| 3029   | 0.70792                                      | 1                                   | 0.70816                                   | 1                                | 0.70785                                      | 1                                   |
| 3030   | 0.70802                                      | 1                                   | 0.70795                                   | 1                                | 0.70794                                      | 1                                   |
| 3032   | 0.70880                                      | 1                                   | 0.70899                                   | 1                                | 0.70858                                      | 1                                   |
| 3050   | 0.70783                                      | 1                                   | 0.70782                                   | 1                                | 0.70783                                      | 1                                   |
| 3062   | 0.70803                                      | 3                                   | 0.70838                                   | 1                                | 0.70824                                      | 1                                   |
| 3063   | 0.70910                                      | 1                                   | 0.70927                                   | 1                                | 0.70918                                      | 1                                   |
| 3064   | 0.70867                                      | 1                                   | 0.70874                                   | 1                                | 0.70849                                      | 1                                   |
| 3075   | 0.70898                                      | 1                                   | 0.70897                                   | 1                                | 0.70863                                      | 1                                   |
| 3076   | 0.70919                                      | 1                                   | 0.70896                                   | 1                                | 0.70880                                      | 1                                   |
| 3078   | 0.70936                                      | 1                                   | 0.71012                                   | 2                                | 0.70951                                      | 1                                   |

<sup>1</sup> Each cement sample was loaded on a single filament, and the standard deviation was then calculated from minimum 100, maximum 200 measured isotope ratios.



**Table S2.**  $^{87}\text{Sr}/^{86}\text{Sr}$  isotope ratio of processed cements after the dil. acid and conc. acid treatment.

| Sample | $^{87}\text{Sr}/^{86}\text{Sr}$ (Dil. Acid) | 2SE x $10^{-5}$ (Dil. Acid) | $^{87}\text{Sr}/^{86}\text{Sr}$ (Conc. Acid) | 2SE x $10^{-5}$ (Conc. Acid) |
|--------|---------------------------------------------|-----------------------------|----------------------------------------------|------------------------------|
| 3022   | 0.70804                                     | 1                           | 0.70803                                      | 1                            |
| 3024   | 0.70811                                     | 1                           | 0.70812                                      | 1                            |
| 3026   | 0.70808                                     | 1                           | 0.70808                                      | 1                            |
| 3027   | 0.70881                                     | 1                           | 0.70881                                      | 3                            |
| 3028   | 0.70823                                     | 1                           | 0.70824                                      | 1                            |
| 3029   | 0.70783                                     | 1                           | 0.70786                                      | 1                            |
| 3030   | 0.70793                                     | 1                           | 0.70795                                      | 2                            |
| 3032   | 0.70856                                     | 1                           | 0.70859                                      | 1                            |
| 3050   | 0.70781                                     | 1                           | 0.70783                                      | 1                            |
| 3062   | 0.70821                                     | 1                           | 0.70821                                      | 1                            |
| 3063   | 0.70917                                     | 1                           | 0.70917                                      | 3                            |
| 3064   | 0.70848                                     | 1                           | 0.70848                                      | 1                            |
| 3075   | 0.70860                                     | 1                           | 0.70861                                      | 1                            |
| 3076   | 0.70879                                     | 1                           | 0.70881                                      | 1                            |
| 3078   | 0.70946                                     | 1                           | 0.70948                                      | 1                            |

**Table S3.** Absolute difference  $\Delta_{abs}$  between the  $^{87}\text{Sr}/^{86}\text{Sr}$  isotope ratio of the cement and the  $^{87}\text{Sr}/^{86}\text{Sr}$  isotope ratio of the corresponding clinker for the four investigated preparation methods.  $\Delta_{abs}$  was calculated using equation (1).

| Sample | $\Delta_{abs}$ (KOSH)<br>$\times 10^{-5}$ | $\Delta_{abs}$ (sieving)<br>$\times 10^{-5}$ | $\Delta_{abs}$ (dil.<br>acid) $\times 10^{-5}$ | $\Delta_{abs}$<br>(conc. acid)<br>$\times 10^{-5}$ |
|--------|-------------------------------------------|----------------------------------------------|------------------------------------------------|----------------------------------------------------|
| 3022   | 2                                         | 0.03                                         | 4                                              | 4                                                  |
| 3024   | 18                                        | 14                                           | 13                                             | 14                                                 |
| 3026   | 6                                         | 10                                           | 11                                             | 10                                                 |
| 3027   | 73                                        | 72                                           | 66                                             | 66                                                 |
| 3028   | 2                                         | 1                                            | 3                                              | 2                                                  |
| 3029   | 24                                        | 7                                            | 8                                              | 5                                                  |
| 3030   | 7                                         | 8                                            | 9                                              | 7                                                  |
| 3032   | 19                                        | 22                                           | 23                                             | 20                                                 |
| 3050   | 1                                         | 0.3                                          | 2                                              | 1                                                  |
| 3062   | 34                                        | 21                                           | 18                                             | 18                                                 |
| 3063   | 18                                        | 8                                            | 7                                              | 7                                                  |
| 3064   | 6                                         | 18                                           | 19                                             | 19                                                 |
| 3075   | 1                                         | 36                                           | 39                                             | 37                                                 |
| 3076   | 24                                        | 39                                           | 40                                             | 38                                                 |
| 3078   | 76                                        | 16                                           | 10                                             | 12                                                 |

**Table S4.** Results of the paired *t*-test for  $^{87}\text{Sr}/^{86}\text{Sr}$  isotope ratios of clinker and KOSH  $^{87}\text{Sr}/^{86}\text{Sr}$  isotope ratios of cements as calculated with Excel (Office 365).

| t-Test: Paired Two Sample for Means |                                         |                                      |
|-------------------------------------|-----------------------------------------|--------------------------------------|
|                                     | $^{87}\text{Sr}/^{86}\text{Sr}$ Clinker | $^{87}\text{Sr}/^{86}\text{Sr}$ KOSH |
| Mean                                | 0.708436                                | 0.708592                             |
| Variance                            | 2.74E-07                                | 3.8E-07                              |
| Observations                        | 15                                      | 15                                   |
| Pearson Correlation                 | 0.891731                                |                                      |
| Hypothesized Mean Difference        | 0                                       |                                      |
| df                                  | 14                                      |                                      |
| t Stat                              | -2.15852                                |                                      |
| P(T<=t) one-tail                    | 0.024369                                |                                      |
| t Critical one-tail                 | 1.76131                                 |                                      |
| P(T<=t) two-tail                    | 0.048737                                |                                      |
| t Critical two-tail                 | 2.144787                                |                                      |

**Table S5.** Results of the paired *t*-test for clinker  $^{87}\text{Sr}/^{86}\text{Sr}$  isotope ratios and sieving  $^{87}\text{Sr}/^{86}\text{Sr}$  isotope ratios of cements as calculated with Excel (Office 365).

| t-Test: Paired Two Sample for Means |                                         |                                        |
|-------------------------------------|-----------------------------------------|----------------------------------------|
|                                     | $^{87}\text{Sr}/^{86}\text{Sr}$ Clinker | $^{87}\text{Sr}/^{86}\text{Sr}$ Sieved |
| Mean                                | 0.708436                                | 0.708429                               |
| Variance                            | 2.74E-07                                | 2.48E-07                               |
| Observations                        | 15                                      | 15                                     |
| Pearson Correlation                 | 0.865751                                |                                        |
| Hypothesized Mean Difference        | 0                                       |                                        |
| df                                  | 14                                      |                                        |
| t Stat                              | 0.107146                                |                                        |
| P(T<=t) one-tail                    | 0.458097                                |                                        |
| t Critical one-tail                 | 1.76131                                 |                                        |
| P(T<=t) two-tail                    | 0.916194                                |                                        |
| t Critical two-tail                 | 2.144787                                |                                        |

**Table S6.** Results of the paired *t*-test for clinker  $^{87}\text{Sr}/^{86}\text{Sr}$  isotope ratios and dil. acid  $^{87}\text{Sr}/^{86}\text{Sr}$  isotope ratios of cements as calculated with Excel (Office 365).

| t-Test: Paired Two Sample for Means |                                                           |                                                       |
|-------------------------------------|-----------------------------------------------------------|-------------------------------------------------------|
|                                     | <i><math>^{87}\text{Sr}/^{86}\text{Sr}</math> Clinker</i> | <i><math>^{87}\text{Sr}/^{86}\text{Sr}</math> Dil</i> |
| Mean                                | 0.708436                                                  | 0.708406                                              |
| Variance                            | 2.74E-07                                                  | 2.41E-07                                              |
| Observations                        | 15                                                        | 15                                                    |
| Pearson Correlation                 | 0.873467                                                  |                                                       |
| Hypothesized Mean Difference        | 0                                                         |                                                       |
| df                                  | 14                                                        |                                                       |
| t Stat                              | 0.447992                                                  |                                                       |
| P(T<=t) one-tail                    | 0.330507                                                  |                                                       |
| t Critical one-tail                 | 1.76131                                                   |                                                       |
| P(T<=t) two-tail                    | 0.661014                                                  |                                                       |
| t Critical two-tail                 | 2.144787                                                  |                                                       |

**Table S7.** Results of the paired *t*-test for clinker  $^{87}\text{Sr}/^{86}\text{Sr}$  isotope ratios and conc. acid  $^{87}\text{Sr}/^{86}\text{Sr}$  isotope ratios of cements as calculated with Excel (Office 365).

| t-Test: Paired Two Sample for Means |                                         |                                      |
|-------------------------------------|-----------------------------------------|--------------------------------------|
|                                     | $^{87}\text{Sr}/^{86}\text{Sr}$ Clinker | $^{87}\text{Sr}/^{86}\text{Sr}$ conc |
| Mean                                | 0.708436                                | 0.708419                             |
| Variance                            | 2.74E-07                                | 2.41E-07                             |
| Observations                        | 15                                      | 15                                   |
| Pearson Correlation                 | 0.877963                                |                                      |
| Hypothesized Mean Difference        | 0                                       |                                      |
| df                                  | 14                                      |                                      |
| t Stat                              | 0.259105                                |                                      |
| P(T<=t) one-tail                    | 0.399662                                |                                      |
| t Critical one-tail                 | 1.76131                                 |                                      |
| P(T<=t) two-tail                    | 0.799325                                |                                      |
| t Critical two-tail                 | 2.144787                                |                                      |
